# Supplementary material for: Insights into cell wall disintegration of Chlorella vulgaris
Source: PubMed Central journal article supplement (PMC8759652; doi:10.1371/journal.pone.0262500), 2022-01-14
Supplement: pone.0262500.s001.pdf [file pone.0262500.s001.pdf]

## Supporting information

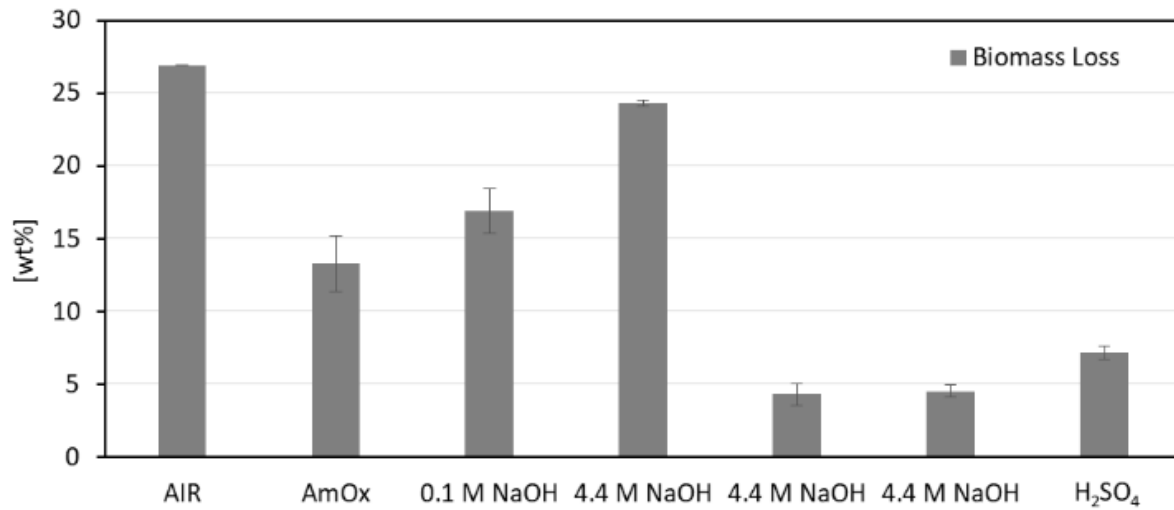

Fig 1: Stepwise degradation of algal biomass AIR. Biomass loss after each treatment (x-axis) referred to initial biomass (y-axis). AmOx: c(di-ammonium oxalate) = 20 mmol L<sup>-1</sup>, pH = 4, T = 70 °C, t = 1 h. 0.1 M NaOH: c(NaOH) = 0.1 mol L<sup>-1</sup>, T = 22 °C, t = 24 h. 4.4 M NaOH: c(NaOH) = 4.4 mol L<sup>-1</sup>, T = 22 °C, t = 8 h. H<sub>2</sub>SO<sub>4</sub>: 72 % H<sub>2</sub>SO<sub>4</sub>, T = 22 °C, t = 1 h, followed by dilution with water to 4 % H<sub>2</sub>SO<sub>4</sub>, T = 100 °C, t = 1 h. n = 3.

Table 1: Protein concentration analyzed with Lowry. BSA solution of 5.0 and 0.50 g L<sup>-1</sup> treated with 4.4 mol L<sup>-1</sup> NaOH for 8 h, 22 °C, 800 rpm

| BSA Stock<br>[g L <sup>-1</sup> ] | Protein detected after 24 h at 22 °C |                               |
|-----------------------------------|--------------------------------------|-------------------------------|
|                                   | in 4.4 M NaOH [g L <sup>-1</sup> ]   | in water (g L <sup>-1</sup> ) |
| 5.0                               | 5.6                                  | 5.5                           |
| 0.50                              | 0.52                                 | 0.54                          |

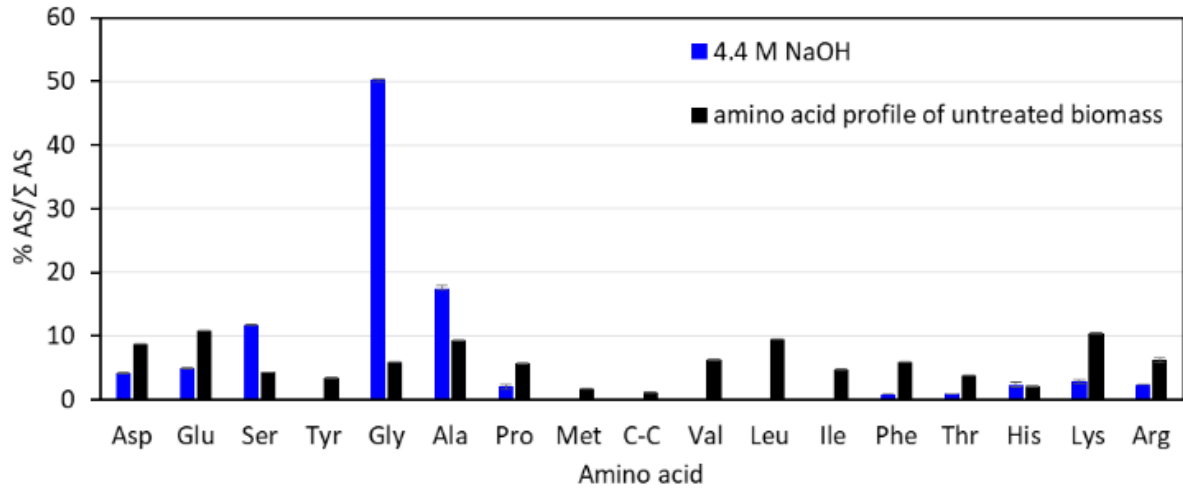

Fig 2: Determination of free amino acids. Free amino acids (x-axis) detected in fraction 4.4 M NaOH (blue) compared to the amino acid profile of untreated *Chlorella* biomass (black).
